# Supplementary material
Source: PubMed Central journal article supplement (PMC7948070)
Supplement: mjaa033_supplementary_data.pdf [file mjaa033_supplementary_data.pdf]

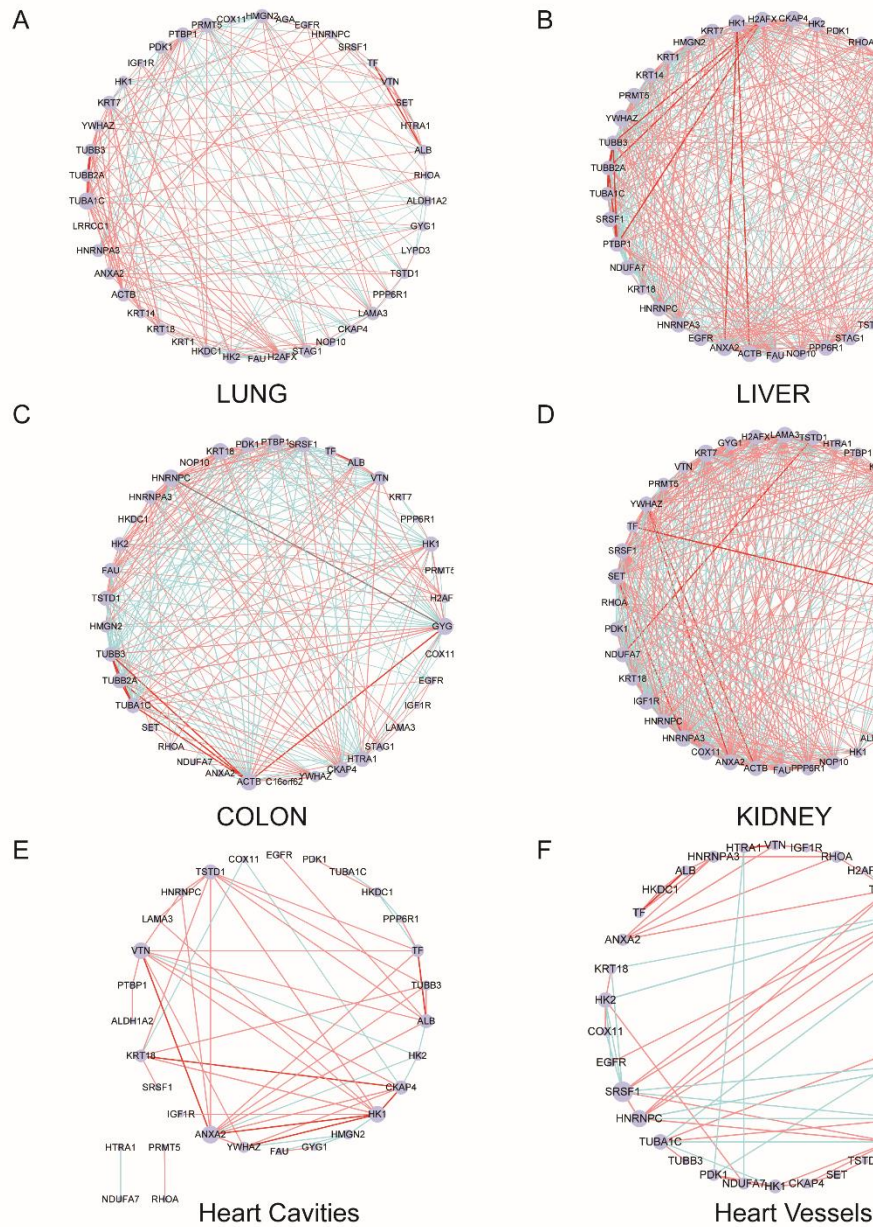

Supplementary Figure S1 Networks of proteins affected by SARS-CoV-2 in 5 organs (The red edge in the network indicates a significant or strong positive correlation between the two proteins, pink is a non-significant or weak positive correlation. Dark blue is a significant or strong negative correlation, light blue is a non-significant or weak negative correlation. The thickness of the edge is determined by the correlation coefficient.

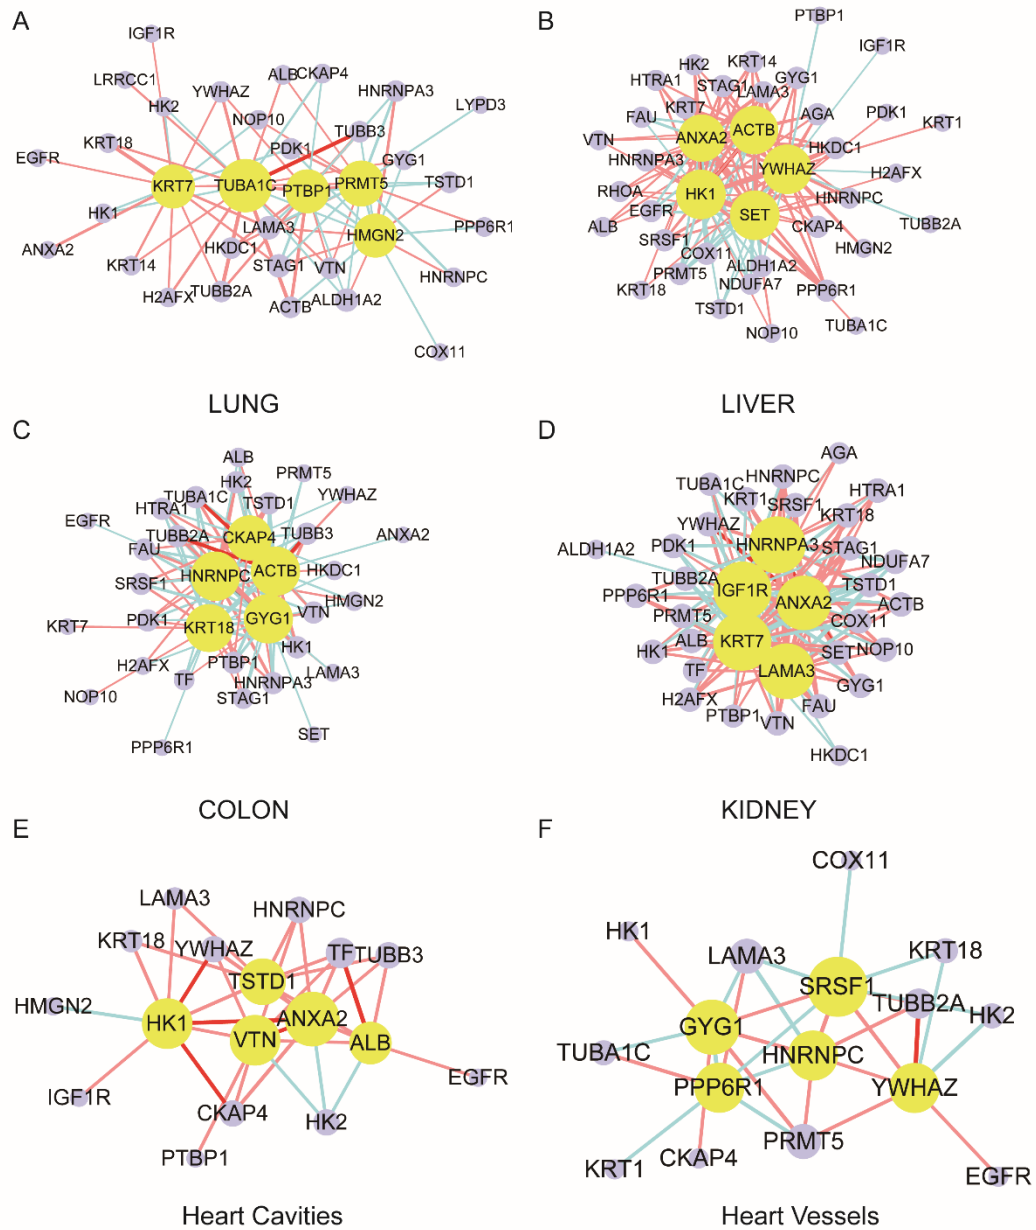

Supplementary Figure S2 Cores of networks consisting of hub proteins affected by SARS-CoV-2 in 5 organs. The yellow ones are the top 5 proteins (The coloring principle of edges is the same as described in Supplementary Figure S1).

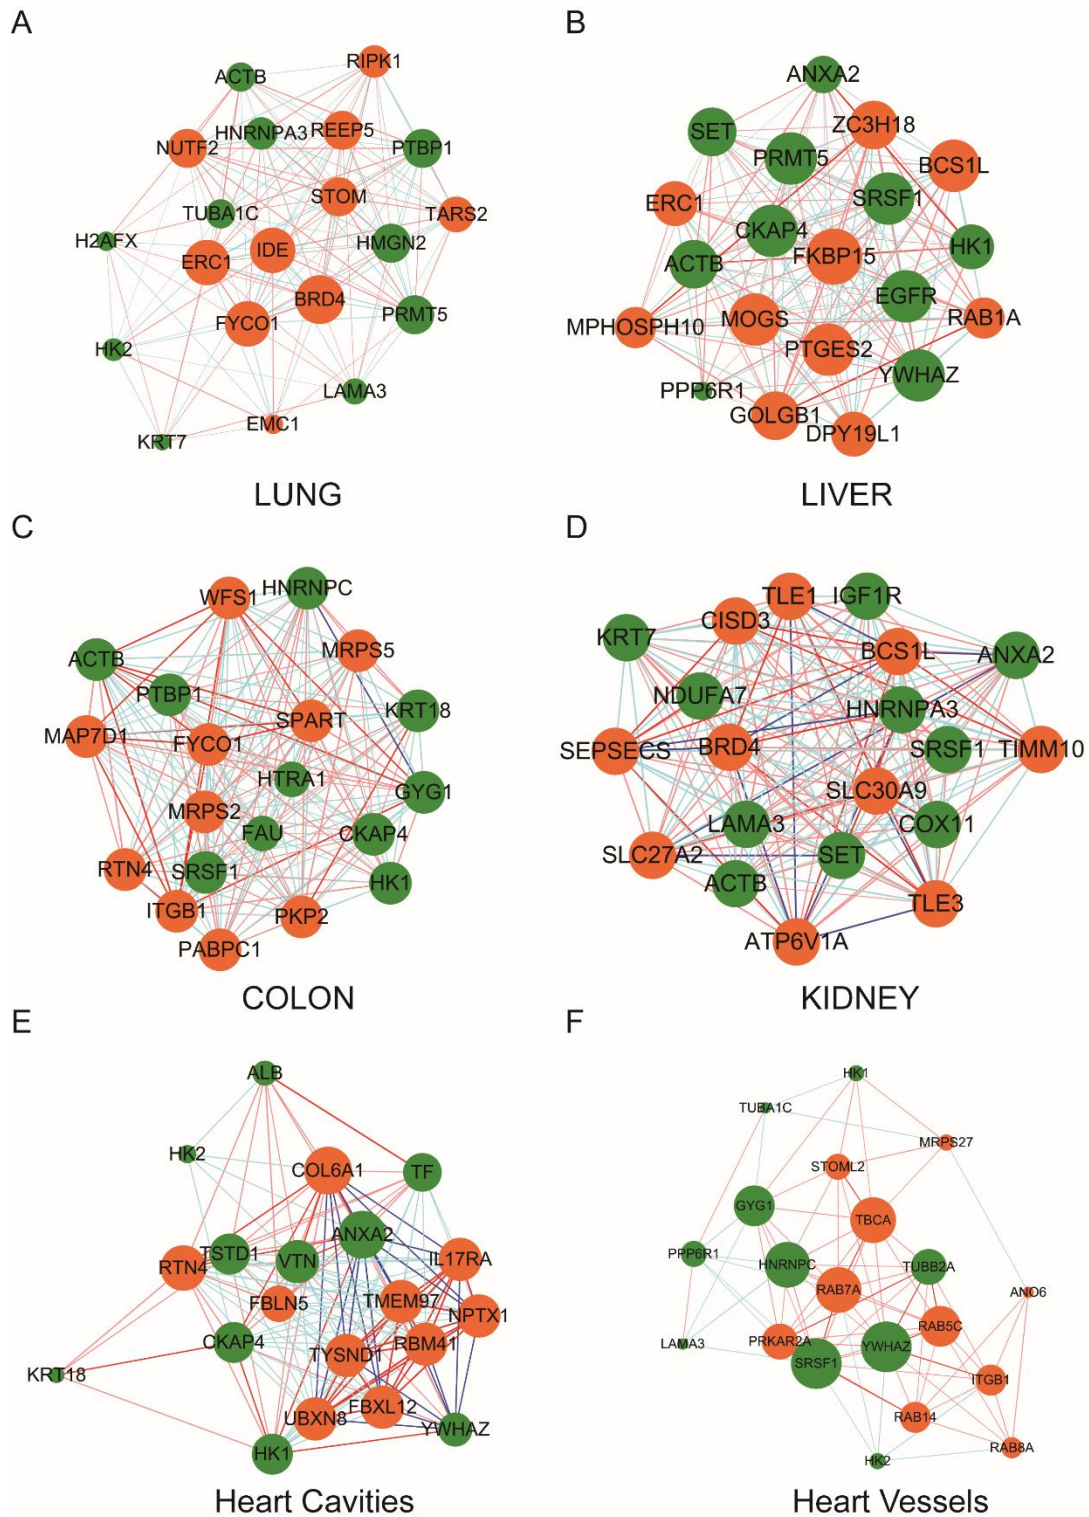

Supplementary Figure S3 Core correlation networks consisting of hub proteins affected by SARS-CoV-2 and hub proteins interacted with SARS-CoV-2 in 5 organs. The green ones are proteins affected by SARS-CoV-2 and the orange ones are proteins interacted with SARS-CoV-2 (The coloring principle of edges is the same as described in Supplementary Figure S1).

**Supplementary Table S1: The top 5 hubs of 188 proteins and the nodes that can be regulated by drugs in different tissues**

| Compound Name  | Human Genes | Tissue Types                                         | Viral Bait | Drug Status                   | Activity Type                       | Source                                |
|----------------|-------------|------------------------------------------------------|------------|-------------------------------|-------------------------------------|---------------------------------------|
| NA             | MRPS5       | Colon                                                | nsp8       | NA                            | NA                                  | NA                                    |
| NA             | RDX         | Colon                                                | nsp13      | NA                            | NA                                  | NA                                    |
| NA             | RBM41       | Heart_Cavities                                       | nsp12      | NA                            | NA                                  | NA                                    |
| NA             | TYSND1      | Heart_Cavities                                       | nsp12      | NA                            | NA                                  | NA                                    |
| NA             | ANO6        | Heart_Vessels                                        | M          | NA                            | NA                                  | NA                                    |
| NA             | FAM162A     | Heart_Vessels                                        | nsp7       | NA                            | NA                                  | NA                                    |
| NA             | MRPS27      | Heart_Vessels                                        | nsp8       | NA                            | NA                                  | NA                                    |
| NA             | RAB14       | Heart_Vessels                                        | nsp7       | NA                            | NA                                  | NA                                    |
| NA             | ATP5MG      | Kidney                                               | nsp6       | NA                            | NA                                  | NA                                    |
| NA             | RAB18       | Kidney                                               | nsp7       | NA                            | NA                                  | NA                                    |
| NA             | RALA        | Kidney                                               | nsp7       | NA                            | NA                                  | NA                                    |
| NA             | SLC30A9     | Kidney                                               | M          | NA                            | NA                                  | NA                                    |
| NA             | GOLGB1      | Liver                                                | nsp13      | NA                            | NA                                  | NA                                    |
| NA             | MOGS        | Liver                                                | nsp7       | NA                            | NA                                  | NA                                    |
| NA             | RAB1A       | Liver                                                | nsp7       | NA                            | NA                                  | NA                                    |
| NA             | ZC3H18      | Liver                                                | E          | NA                            | NA                                  | NA                                    |
| NA             | ERC1        | Lung                                                 | nsp13      | NA                            | NA                                  | NA                                    |
| NA             | IDE         | Lung                                                 | nsp4       | NA                            | NA                                  | NA                                    |
| NA             | REEP5       | Lung                                                 | M          | NA                            | NA                                  | NA                                    |
| NA             | PABPC1      | Colon/Heart_Cavities                                 | N          | NA                            | NA                                  | NA                                    |
| NA             | RTN4        | Colon/Heart_Cavities                                 | M          | NA                            | NA                                  | NA                                    |
| NA             | FYCO1       | Colon/Lung                                           | nsp13      | NA                            | NA                                  | NA                                    |
| NA             | CYB5R3      | Heart_Cavities/Heart_Vessels                         | nsp7       | NA                            | NA                                  | NA                                    |
| Bafilomycin A1 | ATP6V1A     | Heart_Cavities/Heart_Vessels/Kidney/Lung             | M          | Pre-clinical                  | ATPase inhibitor                    | Literature-derived drugs and reagents |
| dBET6          | BRD4        | Heart_Vessels/Kidney/Liver/Lung                      | E          | Pre-clinical                  | Degrades BRD proteins               | Expert-identified drugs and reagents  |
| JQ1            | BRD4        | Heart_Vessels/Kidney/Liver/Lung                      | E          | Pre-clinical                  | BRD inhibitor                       | Literature-derived drugs and reagents |
| ABBV-744       | BRD4        | Heart_Vessels/Kidney/Liver/Lung                      | E          | Clinical Trial                | BRD inhibitor                       | Expert-identified drugs and reagents  |
| RVX-208        | BRD4        | Heart_Vessels/Kidney/Liver/Lung                      | E          | Clinical Trial                | BRD2/4 inhibitor                    | Literature-derived drugs and reagents |
| CPI-0610       | BRD4        | Heart_Vessels/Kidney/Liver/Lung                      | E          | Clinical Trial                | BRD inhibitor                       | Expert-identified drugs and reagents  |
| MZ1            | BRD4        | Heart_Vessels/Kidney/Liver/Lung                      | E          | Pre-clinical                  | Degrades BRD proteins               | Expert-identified drugs and reagents  |
| Ponatinib      | RIPK1       | HeartCavities/Heart_Vessels/Liver/Lung               | nsp12      | Approved (Cancer)             | RIPK1 inhibitor                     | Literature-derived drugs and reagents |
| Indomethacin   | PTGES2      | Colon/Heart_Cavities/Heart_Vessels/Kidney/Liver/Lung | nsp7       | Approved (Inflammation, Pain) | Prostaglandin E2 synthase inhibitor | Literature-derived drugs and reagents |

| Supplementary Table S2: Top 10 hubs of 332 proteins in different tissues |             |                      |            |                               |                                     |                                       |
|--------------------------------------------------------------------------|-------------|----------------------|------------|-------------------------------|-------------------------------------|---------------------------------------|
| Compound Name                                                            | Human Genes | Tissue Types         | Viral Bait | Drug Status                   | Activity Type                       | Source                                |
| NA                                                                       | MAP7D1      | Colon                | orf10      | NA                            | NA                                  | NA                                    |
| NA                                                                       | MRPS2       | Colon                | nsp8       | NA                            | NA                                  | NA                                    |
| NA                                                                       | MRPS5       | Colon                | nsp8       | NA                            | NA                                  | NA                                    |
| NA                                                                       | PABPC1      | Colon                | N          | NA                            | NA                                  | NA                                    |
| NA                                                                       | PKP2        | Colon                | nsp1       | NA                            | NA                                  | NA                                    |
| NA                                                                       | SPART       | Colon                | nsp9       | NA                            | NA                                  | NA                                    |
| NA                                                                       | WFS1        | Colon                | orf9c      | NA                            | NA                                  | NA                                    |
| NA                                                                       | COL6A1      | Heart_Cavities       | orf8       | NA                            | NA                                  | NA                                    |
| NA                                                                       | FBLN5       | Heart_Cavities       | nsp9       | NA                            | NA                                  | NA                                    |
| NA                                                                       | FBXL12      | Heart_Cavities       | orf8       | NA                            | NA                                  | NA                                    |
| NA                                                                       | IL17RA      | Heart_Cavities       | orf8       | NA                            | NA                                  | NA                                    |
| NA                                                                       | NPTX1       | Heart_Cavities       | orf8       | NA                            | NA                                  | NA                                    |
| NA                                                                       | RBM41       | Heart_Cavities       | nsp12      | NA                            | NA                                  | NA                                    |
| Haloperidol                                                              | TMEM97      | Heart_Cavities       | orf9c      | Approved (CNS diseases)       | Sigma 1/2 modulator                 | Literature-derived drugs and reagents |
| PB28                                                                     | TMEM97      | Heart_Cavities       | orf9c      | Pre-clinical                  | Sigma 1/2 modulator                 | Literature-derived drugs and reagents |
| NA                                                                       | TYSND1      | Heart_Cavities       | nsp12      | NA                            | NA                                  | NA                                    |
| NA                                                                       | UBXN8       | Heart_Cavities       | orf9c      | NA                            | NA                                  | NA                                    |
| NA                                                                       | ANO6        | Heart_Vessels        | M          | NA                            | NA                                  | NA                                    |
| NA                                                                       | MRPS27      | Heart_Vessels        | nsp8       | NA                            | NA                                  | NA                                    |
| NA                                                                       | PRKAR2A     | Heart_Vessels        | nsp13      | NA                            | NA                                  | NA                                    |
| NA                                                                       | RAB14       | Heart_Vessels        | nsp7       | NA                            | NA                                  | NA                                    |
| NA                                                                       | RAB5C       | Heart_Vessels        | nsp7       | NA                            | NA                                  | NA                                    |
| NA                                                                       | RAB7A       | Heart_Vessels        | nsp7       | NA                            | NA                                  | NA                                    |
| NA                                                                       | RAB8A       | Heart_Vessels        | nsp7       | NA                            | NA                                  | NA                                    |
| NA                                                                       | STOML2      | Heart_Vessels        | orf3b      | NA                            | NA                                  | NA                                    |
| NA                                                                       | TBCA        | Heart_Vessels        | nsp11      | NA                            | NA                                  | NA                                    |
| Bafilomycin A1                                                           | ATP6V1A     | Kidney               | M          | Pre-clinical                  | ATPase inhibitor                    | Literature-derived drugs and reagents |
| NA                                                                       | CISD3       | Kidney               | orf8       | NA                            | NA                                  | NA                                    |
| NA                                                                       | SEPSECS     | Kidney               | nsp8       | NA                            | NA                                  | NA                                    |
| NA                                                                       | SLC27A2     | Kidney               | nsp2       | NA                            | NA                                  | NA                                    |
| NA                                                                       | SLC30A9     | Kidney               | M          | NA                            | NA                                  | NA                                    |
| NA                                                                       | TIMM10      | Kidney               | nsp4       | NA                            | NA                                  | NA                                    |
| NA                                                                       | TLE1        | Kidney               | nsp13      | NA                            | NA                                  | NA                                    |
| NA                                                                       | TLE3        | Kidney               | nsp13      | NA                            | NA                                  | NA                                    |
| NA                                                                       | DPY19L1     | Liver                | orf9c      | NA                            | NA                                  | NA                                    |
| Rapamycin (Sirolimus)                                                    | FKBP15      | Liver                | nsp2       | Approved (Organ rejection)    | mTOR inhibitor                      | Expert-identified drugs and reagents  |
| NA                                                                       | GOLGB1      | Liver                | nsp13      | NA                            | NA                                  | NA                                    |
| NA                                                                       | MOGS        | Liver                | nsp7       | NA                            | NA                                  | NA                                    |
| NA                                                                       | MPHOSPH10   | Liver                | nsp8       | NA                            | NA                                  | NA                                    |
| Indomethacin                                                             | PTGES2      | Liver                | nsp7       | Approved (Inflammation, Pain) | Prostaglandin E2 synthase inhibitor | Literature-derived drugs and reagents |
| NA                                                                       | RAB1A       | Liver                | nsp7       | NA                            | NA                                  | NA                                    |
| NA                                                                       | ZC3H18      | Liver                | E          | NA                            | NA                                  | NA                                    |
| NA                                                                       | EMC1        | Lung                 | orf8       | NA                            | NA                                  | NA                                    |
| NA                                                                       | IDE         | Lung                 | nsp4       | NA                            | NA                                  | NA                                    |
| NA                                                                       | NUTF2       | Lung                 | nsp15      | NA                            | NA                                  | NA                                    |
| NA                                                                       | REEP5       | Lung                 | M          | NA                            | NA                                  | NA                                    |
| Ponatinib                                                                | RIPK1       | Lung                 | nsp12      | Approved (Cancer)             | RIPK1 inhibitor                     | Literature-derived drugs and reagents |
| NA                                                                       | STOM        | Lung                 | M          | NA                            | NA                                  | NA                                    |
| NA                                                                       | TARS2       | Lung                 | M          | NA                            | NA                                  | NA                                    |
| NA                                                                       | RTN4        | Colon/Heart_Cavities | M          | NA                            | NA                                  | NA                                    |
| NA                                                                       | ITGB1       | Colon/Heart_Vessels  | orf8       | NA                            | NA                                  | NA                                    |
| NA                                                                       | FYCO1       | Colon/Lung           | nsp13      | NA                            | NA                                  | NA                                    |
| NA                                                                       | BCS1L       | Kidney/Liver         | orf9c      | NA                            | NA                                  | NA                                    |
| CPI-0610                                                                 | BRD4        | Kidney/Lung          | E          | Clinical Trial                | BRD inhibitor                       | Expert-identified drugs and reagents  |
| ABBV-744                                                                 | BRD4        | Kidney/Lung          | E          | Clinical Trial                | BRD inhibitor                       | Expert-identified drugs and reagents  |
| dBET6                                                                    | BRD4        | Kidney/Lung          | E          | Pre-clinical                  | Degrades BRD proteins               | Expert-identified drugs and reagents  |
| JQ1                                                                      | BRD4        | Kidney/Lung          | E          | Pre-clinical                  | BRD inhibitor                       | Literature-derived drugs and reagents |
| MZ1                                                                      | BRD4        | Kidney/Lung          | E          | Pre-clinical                  | Degrades BRD proteins               | Expert-identified drugs and reagents  |
| RVX-208                                                                  | BRD4        | Kidney/Lung          | E          | Clinical Trial                | BRD2/4 inhibitor                    | Literature-derived drugs and reagents |
| NA                                                                       | ERC1        | Liver/Lung           | nsp13      | NA                            | NA                                  | NA                                    |

**Supplementary Table S3: The sample size and protein number of the six tissues**

| Tissues        | Sample size | Number of proteins |
|----------------|-------------|--------------------|
| Lung           | 102         | 10816              |
| Liver          | 160         | 9997               |
| Colon          | 100         | 7212               |
| Kidney         | 84          | 9755               |
| Heart Cavities | 18          | 10536              |
| Heart Vessels  | 18          | 10536              |
